# Supplementary material
Source: PubMed Central journal article supplement (PMC10108191)
Supplement: sj-pdf-1-jcb-10.1177_0271678X221146127.pdf [file sj-pdf-1-jcb-10.1177_0271678X221146127.pdf]

# SUPPLEMENT

Table A 1 Model parameter estimates associated with **Error! Reference source not found.** For each response variable, each “X” variable is listed along with the sample size (n), proportion of variance explained by the model (R2), and the parameter estimates with 95% confidence interval. Columns for education are not included since they were never retained after model selection. Finally, for models with a Gender-by-X interaction, the slope estimates for Females and Males are provided.

| Response variable   | X variable                 | Type               | n  | R2    | Intercept               | Age                  | Gender               | X                       | Age:X | Gender:X | Female slope         | Male slope |
|---------------------|----------------------------|--------------------|----|-------|-------------------------|----------------------|----------------------|-------------------------|-------|----------|----------------------|------------|
| Albumin Index       | ABeta Ratio (42/40)        | AD                 | 87 | 0.078 | -0.088 [-0.297, 0.121]  | 0.322 [0.084, 0.560] |                      |                         |       |          |                      |            |
| Albumin Index       | pTau                       | AD                 | 95 | 0.146 | -0.300 [-0.576, -0.024] | 0.282 [0.070, 0.494] | 0.469 [0.079, 0.859] |                         |       |          |                      |            |
| Albumin Index       | bFgf                       | Angiogenic Factors | 76 | 0.081 | -0.168 [-0.401, 0.064]  | 0.334 [0.073, 0.595] |                      |                         |       |          |                      |            |
| Albumin Index       | Flt-1                      | Angiogenic Factors | 76 | 0     | -0.025 [-0.254, 0.204]  |                      |                      |                         |       |          |                      |            |
| Albumin Index       | PIGF                       | Angiogenic Factors | 78 | 0.090 | -0.033 [-0.252, 0.186]  |                      |                      | 0.326 [0.089, 0.564]    |       |          |                      |            |
| Albumin Index       | Tie-2                      | Angiogenic Factors | 79 | 0.078 | -0.114 [-0.343, 0.115]  | 0.332 [0.073, 0.591] |                      |                         |       |          |                      |            |
| Albumin Index       | VEGF-A                     | Angiogenic Factors | 79 | 0.065 | -0.099 [-0.321, 0.123]  | 0.294 [0.042, 0.547] |                      |                         |       |          |                      |            |
| Albumin Index       | VEGF-C                     | Angiogenic Factors | 78 | 0.105 | -0.098 [-0.317, 0.121]  |                      |                      | -0.340 [-0.566, -0.114] |       |          |                      |            |
| Albumin Index       | VEGF-D                     | Angiogenic Factors | 76 | 0.077 | -0.102 [-0.332, 0.129]  | 0.321 [0.064, 0.579] |                      |                         |       |          |                      |            |
| Albumin Index       | IFN-g                      | Cytokines          | 81 | 0.076 | -0.123 [-0.347, 0.101]  | 0.329 [0.073, 0.585] |                      |                         |       |          |                      |            |
| Albumin Index       | IL-1b                      | Cytokines          | 77 | 0.069 | -0.123 [-0.359, 0.113]  | 0.323 [0.050, 0.597] |                      |                         |       |          |                      |            |
| Albumin Index       | IL-2                       | Cytokines          | 81 | 0.076 | -0.123 [-0.347, 0.101]  | 0.329 [0.073, 0.585] |                      |                         |       |          |                      |            |
| Albumin Index       | IL-4                       | Cytokines          | 51 | 0.250 | -0.024 [-0.305, 0.257]  | 0.514 [0.183, 0.845] |                      |                         |       |          |                      |            |
| Albumin Index       | IL-6                       | Cytokines          | 75 | 0.170 | -0.105 [-0.325, 0.115]  | 0.374 [0.122, 0.626] |                      |                         |       |          |                      |            |
| Albumin Index       | IL-8                       | Cytokines          | 70 | 0.220 | -0.158 [-0.382, 0.066]  | 0.285 [0.023, 0.546] |                      |                         |       |          |                      |            |
| Albumin Index       | TNF-a                      | Cytokines          | 79 | 0.185 | -0.298 [-0.600, 0.003]  |                      | 0.496 [0.072, 0.919] |                         |       |          |                      |            |
| Albumin Index       | MMP-1                      | MMP                | 83 | 0.084 | -0.116 [-0.335, 0.103]  | 0.334 [0.091, 0.578] |                      |                         |       |          |                      |            |
| Albumin Index       | MMP-10                     | MMP                | 85 | 0.218 | -0.287 [-0.577, 0.004]  |                      | 0.556 [0.148, 0.965] |                         |       |          |                      |            |
| Albumin Index       | MMP-2                      | MMP                | 86 | 0.236 | -0.210 [-0.492, 0.072]  |                      | 0.447 [0.053, 0.841] |                         |       |          |                      |            |
| Albumin Index       | MMP-3                      | MMP                | 81 | 0.056 | -0.044 [-0.251, 0.162]  |                      |                      |                         |       |          |                      |            |
| Albumin Index       | MMP-9                      | MMP                | 86 | 0.123 | -0.290 [-0.590, 0.010]  | 0.270 [0.039, 0.501] | 0.450 [0.031, 0.869] |                         |       |          |                      |            |
| Albumin Index       | Mean Cortical Thickness    | MRI                | 90 | 0.081 | -0.060 [-0.269, 0.148]  | 0.318 [0.092, 0.544] |                      |                         |       |          |                      |            |
| Albumin Index       | Mean Free Water            | MRI                | 94 | 0.145 | -0.301 [-0.578, -0.024] | 0.275 [0.059, 0.491] | 0.481 [0.085, 0.876] |                         |       |          |                      |            |
| Albumin Index       | Percent Hippocampal Volume | MRI                | 90 | 0.081 | -0.060 [-0.269, 0.148]  | 0.318 [0.092, 0.544] |                      |                         |       |          |                      |            |
| Albumin Index       | PSMD                       | MRI                | 94 | 0.145 | -0.301 [-0.578, -0.024] | 0.275 [0.059, 0.491] | 0.481 [0.085, 0.876] |                         |       |          |                      |            |
| Albumin Index       | WMHV                       | MRI                | 86 | 0.076 | -0.323 [-0.629, -0.017] |                      | 0.566 [0.138, 0.994] |                         |       |          |                      |            |
| Albumin Index       | IgG Index                  | Other              | 95 | 0.153 | -0.262 [-0.535, 0.010]  | 0.304 [0.091, 0.518] | 0.461 [0.072, 0.850] |                         |       |          |                      |            |
| Albumin Index       | Myelin Basic Protein       | Other              | 91 | 0.087 | -0.049 [-0.248, 0.150]  | 0.326 [0.104, 0.549] |                      |                         |       |          |                      |            |
| MRI WM Permeability | ABeta Ratio (42/40)        | AD                 | 56 | 0     | -0.138 [-0.405, 0.129]  |                      |                      |                         |       |          |                      |            |
| MRI WM Permeability | pTau                       | AD                 | 62 | 0     | -0.087 [-0.337, 0.163]  |                      |                      |                         |       |          |                      |            |
| MRI WM Permeability | bFgf                       | Angiogenic Factors | 50 | 0     | -0.216 [-0.503, 0.071]  |                      |                      |                         |       |          |                      |            |
| MRI WM Permeability | Flt-1                      | Angiogenic Factors | 49 | 0     | -0.195 [-0.484, 0.094]  |                      |                      |                         |       |          |                      |            |
| MRI WM Permeability | PIGF                       | Angiogenic Factors | 51 | 0     | -0.203 [-0.480, 0.075]  |                      |                      |                         |       |          |                      |            |
| MRI WM Permeability | Tie-2                      | Angiogenic Factors | 53 | 0     | -0.167 [-0.440, 0.106]  |                      |                      |                         |       |          |                      |            |
| MRI WM Permeability | VEGF-A                     | Angiogenic Factors | 52 | 0     | -0.176 [-0.453, 0.102]  |                      |                      |                         |       |          |                      |            |
| MRI WM Permeability | VEGF-C                     | Angiogenic Factors | 51 | 0     | -0.165 [-0.447, 0.118]  |                      |                      |                         |       |          |                      |            |
| MRI WM Permeability | VEGF-D                     | Angiogenic Factors | 52 | 0     | -0.176 [-0.454, 0.101]  |                      |                      |                         |       |          |                      |            |
| MRI WM Permeability | IFN-g                      | Cytokines          | 54 | 0     | -0.176 [-0.444, 0.092]  |                      |                      |                         |       |          |                      |            |
| MRI WM Permeability | IL-1b                      | Cytokines          | 52 | 0     | -0.183 [-0.452, 0.086]  |                      |                      |                         |       |          |                      |            |
| MRI WM Permeability | IL-2                       | Cytokines          | 54 | 0     | -0.176 [-0.444, 0.092]  |                      |                      |                         |       |          |                      |            |
| MRI WM Permeability | IL-4                       | Cytokines          | 31 | 0     | -0.275 [-0.584, 0.033]  |                      |                      |                         |       |          |                      |            |
| MRI WM Permeability | IL-6                       | Cytokines          | 50 | 0     | -0.149 [-0.432, 0.133]  |                      |                      |                         |       |          |                      |            |
| MRI WM Permeability | IL-8                       | Cytokines          | 47 | 0     | -0.107 [-0.402, 0.189]  |                      |                      |                         |       |          |                      |            |
| MRI WM Permeability | TNF-a                      | Cytokines          | 52 | 0     | -0.189 [-0.464, 0.086]  |                      |                      |                         |       |          |                      |            |
| MRI WM Permeability | MMP-1                      | MMP                | 55 | 0     | -0.106 [-0.378, 0.165]  |                      |                      |                         |       |          |                      |            |
| MRI WM Permeability | MMP-10                     | MMP                | 56 | 0     | -0.105 [-0.373, 0.163]  |                      |                      |                         |       |          |                      |            |
| MRI WM Permeability | MMP-2                      | MMP                | 56 | 0     | -0.110 [-0.378, 0.158]  |                      |                      |                         |       |          |                      |            |
| MRI WM Permeability | MMP-3                      | MMP                | 52 | 0     | -0.149 [-0.422, 0.124]  |                      |                      |                         |       |          |                      |            |
| MRI WM Permeability | MMP-9                      | MMP                | 58 | 0     | -0.144 [-0.402, 0.115]  |                      |                      |                         |       |          |                      |            |
| MRI WM Permeability | Mean Cortical Thickness    | MRI                | 66 | 0     | -0.019 [-0.263, 0.226]  |                      |                      |                         |       |          |                      |            |
| MRI WM Permeability | Mean Free Water            | MRI                | 65 | 0.185 | 0.051 [-0.178, 0.281]   |                      |                      |                         |       |          | 0.466 [0.220, 0.713] |            |
| MRI WM Permeability | Percent Hippocampal Volume | MRI                | 66 | 0     | -0.019 [-0.263, 0.226]  |                      |                      |                         |       |          |                      |            |
| MRI WM Permeability | PSMD                       | MRI                | 65 | 0.188 | 0.047 [-0.182, 0.275]   |                      |                      |                         |       |          | 0.478 [0.228, 0.728] |            |
| MRI WM Permeability | WMHV                       | MRI                | 63 | 0.172 | -0.017 [-0.250, 0.217]  |                      |                      |                         |       |          | 0.412 [0.180, 0.644] |            |
| MRI WM Permeability | IgG Index                  | Other              | 61 | 0     | -0.120 [-0.365, 0.126]  |                      |                      |                         |       |          |                      |            |
| MRI WM Permeability | Myelin Basic Protein       | Other              | 57 | 0     | -0.170 [-0.425, 0.086]  |                      |                      |                         |       |          |                      |            |
